# Supplementary material for: Computational Radical-Scavenging Activity Investigation of Galantamine
Source: Research Square preprint supplement (doi:10.21203/rs.3.rs-2259044/v1), 2022-11-16
Supplement: Supplementary file 1 [file 245e473f91f6c9a39c1d253b.docx]

*SET-PT mechanism of O-H bond breaking*

**Scheme 2** SET-PT mechanism
