# Supplementary material for: Computational Radical-Scavenging Activity Investigation of Galantamine
Source: Research Square preprint supplement (doi:10.21203/rs.3.rs-2259044/v1), 2022-11-16
Supplement: Supplementary file 2 [file 8569d2bca9c9140daeebad79.docx]

**Scheme 4.** Conversion to oxygalantamine
