# Supplementary material for: Computational Radical-Scavenging Activity Investigation of Galantamine
Source: Research Square preprint supplement (doi:10.21203/rs.3.rs-2259044/v1), 2022-11-16
Supplement: Supplementary file 3 [file cbba807963d13695711c0ef0.docx]

*X-H bond breaking*

*HAT mechanism of O-H bond breaking*

**Scheme 1** HAT mechanism
