# Supplementary material for: Computational Radical-Scavenging Activity Investigation of Galantamine
Source: Research Square preprint supplement (doi:10.21203/rs.3.rs-2259044/v1), 2022-11-16
Supplement: Supplementary file 4 [file d82f696f7da323f494f64e7a.docx]

*SPLET mechanism of O-H bond breaking*

**Scheme 3** SPLET mechanism
