# Supplementary material for: Computational Radical-Scavenging Activity Investigation of Galantamine
Source: Research Square preprint supplement (doi:10.21203/rs.3.rs-2259044/v1), 2022-11-16
Supplement: Supplementary file 5 [file fececa224af12e5b38f4fa24.docx]

**Scheme 5.** Hydride ion separation
